22 **Abstract:**

23 Antisense ribosomal siRNAs (risiRNAs) downregulate pre-rRNAs through the  
24 nuclear RNAi pathway in *Caenorhabditis elegans*. However, the biogenesis and  
25 regulation of risiRNAs remain obscure. Previously, we showed that 26S rRNAs are  
26 uridylated at the 3'-ends by an unknown terminal polyuridylation polymerase before  
27 the rRNAs are degraded by a 3' to 5' exoribonuclease SUSI-1(ceDIS3L2). There are  
28 three polyuridylation polymerases, CDE-1, PUP-2, and PUP-3, in *C. elegans*. Here, we  
29 found that CDE-1 is specifically involved in suppressing risiRNA production. CDE-1  
30 localizes to perinuclear granules in the germline and uridylates both Argonaute-  
31 associated 22G-RNAs and 26S rRNAs at the 3'-ends. Immunoprecipitation followed by  
32 mass spectrometry (IP-MS) revealed that CDE-1 interacts with SUSI-1(ceDIS3L2).  
33 Consistent with those results, both CDE-1 and SUSI-1(ceDIS3L2) are required for the  
34 inheritance of RNAi. Therefore, this work identified a rRNA surveillance machinery of  
35 rRNAs that couples terminal polyuridylation and degradation.

36

37

38

39 **Introduction:**

40 RNAs are extensively modified: 5' termini are often capped, internal positions are  
41 altered on both ribose rings and bases, and 3' termini receive untemplated nucleotides,  
42 which are referred to as tails. In eukaryotes, tails occur on most classes of RNAs, and  
43 they control RNA processing, stability, transport and function. Terminal modification  
44 is critical in biology. For example, uridylation is implicated in tumorigenesis,  
45 proliferation, stem cell maintenance, and immune defense against viruses and  
46 retrotransposons (Blahna, Jones et al., 2011, Hagan, Piskounova et al., 2009, Jones,  
47 Quinton et al., 2009, Le Pen, Jiang et al., 2018, Warkocki, Krawczyk et al., 2018, Yeo  
48 & Kim, 2018). The *C. elegans* genome encodes three polyuridylation polymerases  
49 (PUPs): *cde-1/pup-1/cid-1*, *pup-2* and *pup-3* (Kwak & Wickens, 2007). These PUPs  
50 may have distinct roles in different cellular contexts. *cde-1* is involved in the inheritance  
51 of RNAi, chromosome segregation and antiviral defense (Le Pen et al., 2018, van  
52 Wolfswinkel, Claycomb et al., 2009, Xu, Feng et al., 2018). CDE-1 functions with the  
53 RNA-dependent RNA polymerase (RdRP) EGO-1 and the Argonaute CSR-1 in the  
54 germline to affect chromosome segregation (Claycomb, Batista et al., 2009). PUP-2/3  
55 are the homologues of TUT4/7 (terminal uridylyl transferases 4/7) in mammals. PUP-  
56 2 targets the microRNA *let-7* and regulates the stability of LIN-28 (Lehrbach, Armisen  
57 et al., 2009). The balance of CDE-1, PUP-2 and PUP-3 activities appears to ensure  
58 proper germline development in *C. elegans* (Li & Maine, 2018).

59

60 Ribosome biogenesis is a very sophisticated multistep process, in which mistakes  
61 can occur at any step. Cells must carefully surveil the steps of the pre-rRNA processing  
62 and the assembly of ribosomal subunits. Misprocessed rRNAs are usually surveyed and  
63 degraded by multiple supervision machineries, including the exosome complex and the  
64 Trf4/Air2/Mtr4p polyadenylation (TRAMP) complex, etc. (Henras, Plisson-Chastang  
65 et al., 2015, Lafontaine, 2010, Lafontaine, 2015). Aberrant RNAs are degraded by  
66 exosomes in a 3'-5' exonucleolytic decay manner (Houseley, LaCava et al., 2006,  
67 Thoms, Thomson et al., 2015, Vanacova & Stefl, 2007). The exosome-independent  
68 exoribonuclease DIS3L2 plays a pivotal role in the 3'-5' degradation of oligouridylated  
69 RNA fragments (Faehnle, Walleshauser et al., 2014, Lubas, Damgaard et al., 2013,  
70 Pirouz, Munafo et al., 2019, Ustianenko, Pasulka et al., 2016, Zhou, Feng et al., 2017b).

71

72 In addition to degrading erroneous rRNAs, antisense ribosomal siRNAs (risiRNAs)

73 silence pre-rRNAs through the nuclear RNAi pathway to suppress the accumulation of  
74 erroneous rRNAs in *C. elegans* (Yan, Zhu et al., 2019, Zhou, Chen et al., 2017a, Zhou  
75 et al., 2017b, Zhu, Yan et al., 2018). Erroneous rRNAs are usually oligouridylated at  
76 the 3'-ends and then degraded by the exoribonuclease SUSI-1(*ceDis3L2*). However, it  
77 is unclear which terminal uridylyltransferase performs the untemplated addition of the 3'-  
78 end uracil. Identifying which PUP is involved in the 3'-uridylation of erroneous rRNAs  
79 and how it is involved will further our understanding the quality control mechanism of  
80 cellular nucleic acids.

81

82 Here, we found that CDE-1 is specifically involved in suppressing risiRNA  
83 production. CDE-1 localizes to perinuclear granules in the germline and uridylylates both  
84 Argonaute-associated 22G-RNAs and 26S rRNAs at the 3'-ends. Interestingly, we  
85 found that CDE-1 interacts with SUSI-1(*ceDIS3L2*). Both CDE-1 and SUSI-  
86 1(*ceDIS3L2*) are required for the inheritance of RNAi. Therefore, we conclude that  
87 CDE-1 suppresses the generation of risiRNAs by uridylylating 26S rRNA and recruiting  
88 SUSI-1(*ceDIS3L2*) to the rRNA.

89

## 90 **Results:**

### 91 **Depletion of CDE-1 promotes risiRNA production**

92 There are three RNA terminal uridylyltransferase genes, *cde-1*, *pup-2*, and *pup-3*,  
93 that are involved in RNA 3' uridylation in *C. elegans*. We previously showed that  
94 risiRNA was enriched in WAGO-4-bound siRNAs in *cde-1* mutants (Xu et al., 2018).  
95 To further study the specificity and function of *cde-1* in risiRNA production, we used  
96 the *GFP::NRDE-3* transgene as a reporter. NRDE-3 is an Argonaute protein that  
97 transports siRNAs from the cytoplasm to the nucleus (Guang, Bochner et al., 2008).  
98 NRDE-3 localizes to the nucleus when it binds to siRNAs, but it accumulates in the  
99 cytoplasm when not bound to siRNA ligands. Disruption of the generation of  
100 endogenous siRNAs, for example, in the *eri-1* mutant result in relocalization of NRDE-  
101 3 from the nucleus to the cytoplasm. We crossed *eri-1(mg366);GFP::NRDE-3* onto the  
102 *pup* mutant lines and found that the depletion of *cde-1*, but not *pup-2* or *pup-3*, was able  
103 to redistribute NRDE-3 from the cytoplasm to the nucleus (Figure 1A). We generated a

104 single copy transgene *CDE-1::mCherry* by MosSCI technology. This transgene was  
105 able to rescue the *cde-1(tm936)* defects and redistribute NRDE-3 from the nucleus to  
106 the cytoplasm (Figure S1A). To exclude the possibility that PUP-2 and PUP-3 act  
107 redundantly to suppress siRNA generation, we generated *pup-2;pup-3* double mutants.  
108 In the double mutants, NRDE-3 still accumulated in the cytoplasm (Figure S1B). These  
109 data suggest that NRDE-3 was bound to newly generated siRNAs in *cde-1* mutants.

110

111 To test whether the NRDE-3-bound siRNAs in *cde-1* mutants contain risiRNA  
112 sequences, we used a risiRNA sensor expressing a *his-72p::gfp::his-72* reporter fused  
113 to the 26S rRNA sequence (Figure 1B). The sensor was expressed in wild-type N2 and  
114 *eri-1(mg366)* animals but silenced in *cde-1(tm936)* mutants. We quantified the amount  
115 of risiRNA by quantitative real-time PCR analysis and found that risiRNAs were  
116 increased in *cde-1* mutants (Figure 1C).

117

118 Last, we immunoprecipitated NRDE-3 and deep sequenced its associated small  
119 RNAs in *eri-1(mg366);GFP::NRDE-3* and *eri-1(mg366);cde-1(tm936);GFP::NRDE-*  
120 *3* animals in a 5'-phosphate-independent manner. Notably, the proportion of NRDE-3-  
121 bound risiRNAs increased approximately 164-fold in *eri-1(mg366);cde-*  
122 *1(tm936);GFP::NRDE-3* animals compared to the values observed in control animals  
123 (Figures 1D and 1E). The abundance of risiRNAs targeting each rRNA region increased  
124 in *cde-1(tm936)* animals (Figure 1F).

125

126 To search for the genetic requirements of risiRNA production in the *cde-1* mutants,  
127 we crossed *rrf-1*, *rrf-2*, and *rrf-3*, lines onto the *eri-1(mg366);cde-*  
128 *1(tm936);GFP::NRDE-3* animals. RRF-1, RRF-2, and RRF-3 are RNA-dependent  
129 RNA polymerases that are important for the generation of 22G-RNAs in *C. elegans*.  
130 Consistent with previous results, the depletion of *rrf-1* and *rrf-2* together resulted in  
131 NRDE-3 being redistributed from the nucleus to the cytoplasm (Figure S1C). In  
132 addition, the depletion of *rrf-1* and *rrf-2* together partially restored the fecundity of *eri-*  
133 *1;cde-1* animals (Figure S1D).

134

135 We conclude that *cde-1* likely acts as a suppressor of siRNA (*susi*) gene and  
136 suppresses the generation of risiRNAs.

137

### 138 **CDE-1 uridylates risiRNA**

139 We first compared the small RNA expression profiles between wild-type and *cde-*  
140 *1* mutant animals. Small RNAs were isolated from young adult animals through use of  
141 the TRIzol reagent and deep sequenced in a 5'-phosphate-independent manner. Although  
142 the depletion of *cde-1* did not noticeably change the expression profile of different small  
143 RNA categories, risiRNAs were enriched 4.7 fold in *cde-1* mutant animals vs wild-type  
144 animals (Figure 2A). We then immunoprecipitated GFP::NRDE-3 and deep sequenced  
145 the associated siRNAs. NRDE-3-bound risiRNAs were enriched 17 fold in *cde-1*  
146 mutant animals, compared to what was observed in control animals (Figure 2B).

147

148 To test whether risiRNAs bind to Argonaute proteins in addition to NRDE-3, we  
149 analyzed HRDE-1 and WAGO-1-bound small RNAs in the young adult animals.  
150 HRDE-1 and WAGO-1 were immunoprecipitated from the control animals and the *cde-*  
151 *1(tm936)* mutant animals. Small RNAs were isolated and deep sequenced in the 5'-  
152 phosphate-independent method. In *cde-1* mutants, the amount of risiRNAs bound to  
153 HRDE-1 and WAGO-1 increased 9.9- and 1.6-fold, respectively, compared to those  
154 bound in wild-type animals (Figure 2B). The NRDE-3-, HRDE-1-, and WAGO-1-  
155 bound small RNAs still exhibited the characteristics of 22G-RNAs, which is 22 nt in  
156 length and starts with 5' guanine in the mutants (Figure S2). A similar increase in  
157 risiRNA was observed in WAGO-4-bound risiRNAs in *cde-1* mutants (Xu et al., 2018).  
158 CDE-1 adds untemplated uracil to the 3'-ends of CSR-1- and WAGO-4-bound siRNAs.  
159 We analyzed the NRDE-3-bound risiRNAs and found that there was a loss of the added  
160 untemplated uracil in *cde-1* mutants (Figure 2C).

161

162 Small RNAs associate with NRDE-3 and guide NRDE-3 to the target nuclear  
163 nucleic acids. In the presence of risiRNA, NRDE-3 accumulated in the nucleoli of *cde-*

164 *I* mutants (Figure 2D). FIB-1 in *C. elegans* is encoded by an ortholog of the genes  
165 encoding human fibrillarlin and *Saccharomyces cerevisiae* Nop1p (Lee, Lee et al., 2012,  
166 Yi, Ma et al., 2015). FIB-1 localizes to the nucleolus in embryos.

167

### 168 **CDE-1 interacts with SUSI-1(ceDIS3L2) in the germline**

169 To further understand the function of CDE-1, we constructed a GFP::3×FLAG  
170 tagged *cde-1p::CDE-1::GFP::3×FLAG* transgene (abbreviated as *CDE-1::GFP*) using  
171 Mos1-mediated single-copy insertion (MosSCI) technology. CDE-1 was expressed in  
172 the germline cells at all developmental stages (Figure S3A). We noticed that CDE-1  
173 accumulated in both the cytoplasm and the perinuclear region exhibiting distinct foci  
174 in the germline of adult animals. We crossed the *CDE-1::GFP* strain with the P-granule  
175 marker strain *mRuby::PGL-1*, and found that perinuclear localized CDE-1 largely  
176 colocalized with the P-granule marker PGL-1 (Figure 3A).

177

178 We searched for proteins that interact with CDE-1. We used  
179 coimmunoprecipitation followed by mass spectrometry (IP-MS) to identify proteins  
180 that potentially interact with CDE-1. Strikingly, we identified SUSI-1(ceDis3L2)  
181 (Figure 3B and Figure S3B). SUSI-1 is a 3' to 5' exoribonuclease that degrades  
182 oligouridylated RNAs. In *susi-1* mutants, both risiRNAs and oligouridylated rRNAs  
183 accumulate (Zhou et al., 2017b). To confirm the protein-protein interaction between  
184 CDE-1 and SUSI-1, we generated an antibody targeting SUSI-1(ceDis3L2). CDE-  
185 1::GFP was immunoprecipitated by anti-FLAG antibody. Western blotting of the  
186 pelleted proteins with SUSI-1(ceDis3L2) antiserum confirmed the protein-protein  
187 interaction between CDE-1 and SUSI-1(ceDis3L2) *in vivo* (Figure 3C). We then  
188 generated single-copy *3×FLAG::GFP::SUSI-1* and *CDE-1::mCherry* transgenes and  
189 found that SUSI-1(ceDis3L2) accumulated in the cytoplasm of the germline (Figure  
190 3D).

191

192 Therefore, we conclude that CDE-1 and SUSI-1 likely function as a protein  
193 complex to suppress risiRNA production.

194

### 195 **CDE-1 is involved in uridylation of 26S rRNA**

196 Previously we showed that SUSI-1 degrades oligouridylated rRNAs and suppresses  
197 the production of risiRNA (Zhou et al., 2017b). To test whether CDE-1 uridylates  
198 rRNAs, we used a 3' tail-seq assay to examine whether rRNA that was oligouridylated  
199 at 3'-tail was depleted in *cde-1(tm936)* animals (Figures 4A and 4B). Total RNA was  
200 isolated from embryos and L3-staged control and *cde-1* animals, ligated to a barcoded  
201 DNA linker and reverse transcribed with a primer complementary to the linker.  
202 Libraries were then prepared by PCR with a 26S rRNA primer and a primer targeting  
203 the linker. Illumina adaptor sequences were subsequently added, which was followed  
204 by a number of PCR cycles and high-throughput sequencing.

205

206 The 3'-end of 26S rRNA was extensively modified by all four nucleotides  
207 compared to the annotated rRNA sequence (Zhou et al., 2017). Only a small fraction of  
208 the 3'-end exactly matched to the annotated 26S rRNA from the Wormbase WS250  
209 assembly. Although we did not detect a dramatic change in the nontemplated addition  
210 of a single nucleotide, we observed a modest depletion of oligouridylation at the 3'-tail  
211 of 26S rRNA, comparing *cde-1(tm936)* to control animals (Figure 4B). The  
212 introduction of the *CDE-1::mCherry* transgene can rescue this oligouridylation defect.  
213 We conclude that CDE-1 is involved in uridylating rRNAs.

214

### 215 **SUSI-1(ceDIS3L2) is required for the inheritance of RNAi**

216 It was previously showed that CDE-1 is required for the inheritance of RNAi by  
217 uridylating WAGO-4-associated siRNAs (Spracklin, Fields et al., 2017, Xu et al., 2018).  
218 Since CDE-1 interacts with SUSI-1(ceDIS3L2), we tested whether *susi-1* was also  
219 required for the inheritance of RNAi. We used a germline-expressed *mex-*  
220 *5p::GFP::H2B* (abbreviated as *GFP::H2B*) transgene as a reporter, which can inherit  
221 RNAi-induced gene silencing for multiple generations. Both *hrde-1* and *cde-1* were not  
222 required for exogenous *gfp* dsRNA to silence the *GFP::H2B* transgene in the parental  
223 generation, but they were essential for silencing in the F1 generation (Figures 5A and



224 5B). Similarly, *susi-1(ceDis3L2)* was not required for exogenous *gfp* dsRNA to silence  
225 the *GFP::H2B* transgene in the P0 generation, but was necessary for silencing in F1  
226 progeny. We conclude that *susi-1(ceDis3L2)* is required for the inheritance of RNAi.

227

228

## 229 **Discussion:**

230 Misprocessed rRNAs are usually detected and degraded by surveillance machinery  
231 during ribosome biogenesis. Previously, our lab identified a class of antisense ribosomal  
232 siRNAs (risRNAs) that downregulate pre-rRNAs through the nuclear RNAi pathway  
233 to suppress the accumulation of erroneous rRNAs. We identified a number of broadly  
234 conserved genes that are involved in rRNA processing and maturation. The depletion  
235 of these genes lead to an increase in risRNAs. Thereafter, these genes are named  
236 suppressor of siRNA (*susi*). Among them, SUSI-1(ceDIS3L2) plays a vital role in the  
237 3'-5' degradation of oligouridylated rRNA fragments. In this work, we further found  
238 that CDE-1 uridylates the 3'-end of 26S rRNAs and recruits SUSI-1(ceDIS3L2) through  
239 protein-protein interactions. Therefore, we conclude that *cde-1* is a new *susi* gene and  
240 suppresses the generation of risRNAs.

241

242 Uridylation of the 3'-end of RNAs plays important functions in determining the  
243 fate of RNA (Lee, Kim et al., 2014, Menezes, Balzeau et al., 2018). For example,  
244 uridylation is an intrinsic step in the maturation of noncoding RNAs, including the U6  
245 spliceosomal RNA or mitochondrial guide RNAs in trypanosomes (Trippe, Guschina  
246 et al., 2006). Uridylation can also switch specific miRNA precursors from a degradative  
247 to a processing mode. This switch depends on the number of uracils added and is  
248 regulated by the cellular context (De Almeida, Scheer et al., 2018, Heo, Ha et al., 2012).  
249 However, the typical consequence of uridylation is accelerating the RNA degradation  
250 (Pirouz, Du et al., 2016, Ustianenko et al., 2016). In this work, we showed that CDE-1  
251 can uridylate 26S rRNAs and recruit the 3'-5' exoribonuclease SUSI-1(ceDIS3L2),  
252 which may further promote the degradation of oligouridylated rRNAs. In the absence  
253 of either CDE-1 or SUSI-1(ceDIS3L2), erroneous rRNAs will accumulate in cells,

254 which thereafter recruit the RNA-dependent RNA polymerases, including RRF-1 and  
255 RRF-2, to initiate risiRNA production (Figure 6). risiRNAs then bind to both nuclear  
256 and cytoplasmic Argonaute proteins and silence rRNAs through both nuclear and  
257 cytoplasmic RNAi machinery. Therefore, risiRNA and the RNAi machinery, together  
258 with exoribonucleases, act to avoid the accumulation of potentially harmful or  
259 unnecessary erroneous rRNA transcripts (Henras et al., 2015, Houseley et al., 2006,  
260 Karbstein, 2013, Lafontaine, 2010, Pena, Hurt et al., 2017, Schmidt & Butler, 2013,  
261 Vanacova & Stefl, 2007).

262

263 3'-end modifications play important roles in regulating the stability of siRNAs via  
264 distinct mechanisms as well. For example, methylation of the 3'-end inhibits uridylation  
265 and correlates with increased steady state levels of small RNAs (Kamminga, Luteijn et  
266 al., 2010, Ren, Xie et al., 2014). In contrary, 3' terminal uridylation may promote the  
267 degradation of siRNA (Ibrahim, Rymarquis et al., 2010, van Wolfswinkel et al., 2009).  
268 Among the three PUP proteins in *C. elegans*, CDE-1 uridylates endogenous siRNAs  
269 and modulates their binding affinity to CSR-1 and WAGO-4 (van Wolfswinkel et al.,  
270 2009, Xu et al., 2018). PUP-2 has been reported to target *let-7* miRNA (Heo et al., 2012,  
271 Lehrbach et al., 2009). Although PUP-3 has been validated as uridyl transferase, its  
272 targets are still unclear. Here, we found that CDE-1, but not PUP-2 or PUP-3, are  
273 engaged in suppressing risiRNA production. How these PUPs recognize their specific  
274 targets is an enigma.

275

276 Additional questions remain as to how and why erroneous rRNAs could be  
277 recognized by CDE-1. Our previous work found that either the modification errors or  
278 processing errors of rRNAs trigger the generation of risiRNAs (Zhu et al., 2018). How  
279 these different kinds of errors are sensed and scrutinized is still unknown. Deciphering  
280 the intricate interaction network of CDE-1 or other TUTases is key to fully  
281 understanding the effect of RNA uridylation. In addition, CDE-1 was previously  
282 reported required for RNAi inheritance (Spracklin et al., 2017, Xu et al., 2018). The  
283 underlying mechanism remains unclear. Here, we found that CDE-1 interacted with

284 SUSI-1, another protein required for the inheritance of RNAi. Further elucidating the  
285 function of SUSI-1 and CDE-1 will shed light on the mechanism of RNAi inheritance.

286

## 287 **Materials and methods:**

### 288 **Strains**

289 Bistol strain N2 was used as the standard wild-type strain. All strains were grown  
290 at 20°C unless otherwise specified. The strains used in this study were listed in  
291 supplementary Table S1.

292

### 293 **Quantification of the subcellular location of NRDE-3**

294 The subcellular localization of NRDE-3 was quantified as described previously  
295 (Zhou et al., 2017b). Images were collected on a Leica DM4B microscope.

296

### 297 **Quantitative RT-PCR**

298 RNA was isolated from the indicated animals and subjected to DNase I digestion  
299 (Thermo Fisher). cDNA was generated from the isolated RNA using a  
300 *GoScript™ Reverse Transcription System* (Promega) according to the vendor's  
301 protocol. qPCR was performed using a MyIQ2 real-time PCR system (Bio-Rad) with  
302 an AceQ SYBR Green Master mix (Vazyme). The primers used in RT-qPCR were  
303 listed in Table S2. *eft-3* mRNA was used as an internal control for sample normalization.  
304 Data analysis was performed using a comparative threshold cycle ( $\Delta\Delta CT$ ) approach.

305

### 306 **Brood size**

307 Synchronized L3 worms were individually placed onto fresh NGM plates, and the  
308 progeny numbers were scored.

309

### 310 **Construction of plasmids and transgenic strains**

311 For *CDE-1::GFP*, a *cde-1* promoter and CDS region were PCR-amplified with the  
312 primers 5'-TACGACTCACTAGTGGGCAGgacgtgggacataaacgaagaag-3' and 5'-  
313 ATAGCTCCACCTCCACCTCCTTTGTTGTACGAGCGATGATAG-3' from N2

314 genomic DNA. A *GFP::3×FLAG* region was PCR-amplified with the primers 5'-  
315 GGAGGTGGAGGTGGAGCTATGAGTAAAGGAGAAGAAC-3' and 5'-  
316 TCACTTGTTCATCGTCATCCT-3' from plasmid pSG085. The *CDE-1* 3' UTR  
317 (untranslated region) was PCR-amplified with the primers 5'-  
318 ACAAGGATGACGATGACAAGTAAattctctccaccattcac-3' and 5'-  
319 CTACGTAATACGACTCACTTaactgatcgggtgcttctctcac-3' from N2 genomic DNA. A  
320 ClonExpress MultiS One-step Cloning Kit (Vazyme, C113-02) was used to insert the  
321 *CDE-1::GFP::3×FLAG* fusion gene into the pCFJ151 vector. The transgene was  
322 integrated into *C. elegans* chromosome II by the MosSCI method (Frokjaer-Jensen,  
323 Davis et al., 2014). Using the same method, the *CDE-1::mCherry* fusion gene was  
324 integrated into *C. elegans* chromosome V.

325

326 The primers used for dual-sgRNA-directed CRISPR/Cas9-mediated *cde-1* gene  
327 deletion were 5'-TCCGGATAGTGATTACAATG-3' and 5'-  
328 GGTATTATGTTGAACGACAT-3'.

329 For *3×FLAG::GFP::SUSI-1*, the predicted *susi-1* promoter was PCR-amplified  
330 with the primers 5'-TACGACTCACTAGTGGGCAGtaccaggagattctgctgtg-3' and 5'-  
331 tcatggtctttgtagtccatACTTTCAACTGCTGACATctag-3' from N2 genomic DNA. The  
332 *3×FLAG::GFP* coding region was PCR amplified from plasmid pSG085 with the  
333 primers 5'-AGCTCTTCCTATGGACTACAAAGACCATGAC-3' and 5'-  
334 ATAGCTCCACCTCCACCTCCTTTGTATAGTTCATCCATGCC-3'. The *SUSI-1*  
335 coding region and the predicted 3' UTR were then amplified by PCR from N2 genomic  
336 DNA with primers 5'-  
337 AAGGAGGTGGAGGTGGAGCTATGTCAGCAGTTGAAAGTCCCG-3' and 5'-  
338 CTACGTAATACGACTCACTTGTGTGGATTAACACAGCCAATTG-3' from N2  
339 genomic DNA. The ClonExpress MultiS One-step Cloning Kit (Vazyme, C113-02) was  
340 used to insert the *3×FLAG::GFP::SUSI-1* fusion gene into the pCFJ151 vector. The  
341 transgene was integrated into *C. elegans* chromosome II by the MosSCI system.

342

343 **RNA immunoprecipitation (RIP)**

344 RIP experiments were performed as previously described with hypochlorite-isolated  
345 embryos of indicated animals (Zhou et al., 2017b). The embryos were sonicated in lysis  
346 buffer (20 mM Tris-HCl (pH 7.5), 200 mM NaCl, 2.5 mM MgCl<sub>2</sub>, and 0.5% NP-40),  
347 precleared with protein G-agarose beads (Roche), and incubated with anti-FLAG M2  
348 agarose beads (Sigma #A2220). The beads were washed extensively, and  
349 3×FLAG::GFP-tagged protein and associated RNAs were eluted with 100 µg/mL  
350 3×FLAG peptide (Sigma). The eluates were incubated with TRIzol reagent  
351 (Invitrogen), which was followed by isopropanol precipitation. Then, small RNAs were  
352 quantified by deep sequencing.

353

### 354 **Deep sequencing of small RNAs and bioinformatic analysis**

355 Total RNAs and the Argonaute-associated RNAs were isolated from the indicated  
356 animals and subjected to small RNA deep sequencing using an Illumina platform  
357 (Novogene Bioinformatics Technology Co., Ltd.), as previously described (Zhou et al.,  
358 2017b).

359

360 For Argonaute-associated RNAs, synchronized worms were sonicated in  
361 sonication buffer (20 mM Tris-HCl, pH 7.5, 200 mM NaCl, 2.5 mM MgCl<sub>2</sub>, and 0.5%  
362 NP40). The eluates were incubated with TRIzol reagent and then precipitated with  
363 isopropanol. The precipitated RNA was treated with FastAP Thermosensitive Alkaline  
364 Phosphatase (Thermo Scientific), re-extracted with TRIzol, and treated with T4  
365 Polynucleotide Kinase (T4 PNK, Thermo Scientific) in the presence of 1 mM ATP  
366 before library construction.

367

368 Small RNAs were subjected to deep sequencing using an Illumina platform  
369 (Novogene Bioinformatics Technology Co., Ltd.). Briefly, small RNAs ranging from  
370 18 to 30 nt were gel-purified and ligated to a 3' adaptor (5'-  
371 pUCGUAUGCCGUCUUCUGCUUGidT-3'; p, phosphate; idT, inverted  
372 deoxythymidine) and a 5' adaptor (5'-GUUCAGAGUUCUACAGUCCGACGAUC-3'),  
373 respectively. The ligation products were gel-purified, reverse transcribed, and amplified

374 using an Illumina sRNA primer set (5'-CAAGCAGAAGACGGCATAACGA-3'; 5'-  
375 AATGATACGGCGACCACCGA-3'). The samples were then sequenced using an  
376 Illumina HiSeq platform.

377

378 The Illumina-generated raw reads were first filtered to remove adaptors, low-  
379 quality tags and contaminants to obtain clean reads by Novogene. Clean reads ranging  
380 from 18 to 30 nt were mapped to the transcriptome assembly WS243 using Bowtie2  
381 with default parameters. The number of reads targeting each transcript were counted by  
382 custom Perl scripts. The number of total reads mapped to the genome minus the number  
383 of total reads corresponded to sense rRNA transcripts (5S, 5.8S, 18S and 26S), which  
384 was used as the normalization number, to exclude the possible degradation fragments  
385 of sense rRNAs.

386

### 387 **Proteomic analysis**

388 Proteomic analysis was conducted as previously described (Zeng, Weng et al.,  
389 2019). Briefly, mixed-stage transgenic worms expressing CDE-1::GFP were  
390 resuspended in equal volumes of 2× lysis buffer (50 mM Tris-HCl pH 8.0, 300 mM  
391 NaCl, 10% glycerol, 1% Triton X-100, Roche®cOmplete EDTA-free Protease Inhibitor  
392 Cocktail, 10 mM NaF, and 2 mM Na<sub>3</sub>VO<sub>4</sub>), and lysed in a FastPrep-24 5G homogenizer.  
393 The lysate supernatant was incubated with anti-GFP antibody, which was linked to  
394 beads, for one hour at 4 °C. The beads were then washed three times with cold lysis  
395 buffer. The GFP immunoprecipitates were eluted with chilled elution buffer (100 mM  
396 glycine-HCl, pH 2.5). Approximately 1/8 of the eluates were subjected to western  
397 blotting analysis. The rest of the eluates were precipitated with TCA or cold acetone  
398 and dissolved in 100 mM Tris (pH 8.5), with 8 M urea. The proteins were reduced with  
399 TCEP, alkylated with IAA, and finally digested with trypsin at 37 °C overnight. LC-  
400 MS/MS analysis of the resulting peptides and MS data processing approaches were  
401 conducted as previously described (Feng, Zhu et al., 2017). A WD scoring matrix was  
402 used to identify high-confidence candidate interacting proteins.

403

#### 404 **Coimmunoprecipitation analysis**

405 The lysates of transgenic worms were prepared using RIP lysis buffer (50 mM Tris  
406 (pH 7.4), 150 mM NaCl, 1% NP-40, 0.1% SDS, 1 mM EDTA, 0.5% sodium  
407 deoxycholate, and protease inhibitors (Thermo)]. Immunoprecipitations with anti-  
408 FLAG® M2 affinity gel (a2220, Sigma) or agarose beads (ab193255, Abcam) with anti-  
409 GFP antibody (ab290, Abcam) and anti-SUSI-1 antibody (lot number 20121105,  
410 Abmart) were performed at 4 °C overnight. Protein complexes were eluted by boiling  
411 in 2× SDS loading buffer. Anti-GFP, anti-SUSI-1 and anti-Actin (Servicebio GB12001)  
412 antibodies that were used for western blots were diluted to 1:2000, 1:500 and 1:5000,  
413 respectively.

414

#### 415 **rRNA 3' tail-seq**

416 26S rRNA tail-seq was conducted as described previously (Zhou et al., 2017b).  
417 Briefly, total RNA were extracted from embryos or L3 larva, digested by DNase I, and  
418 then ligated to the following 3' RNA linkers with T4 RNA ligase (Thermo #EL0021) (1  
419 µg total RNA, 2 µl 3' RNA linker (10 µM), 1 µl 10× T4 RNA ligation buffer, 2 µl T4  
420 RNA ligase) by incubating at 37 °C for 30 min.

421 3' RNA linker: 5'-  
422 pGATCCCACACTCGGGCACCAAGGATTTAACCGCGAATTCCAGC-NH2-3' (the  
423 underlined sequence served as a barcode for sample labeling).

424 The RNAs were reverse transcribed with the following primers:

425 3' linker RT: 5'-  
426 GCTGGAATTCGCGGTAAATCCTTGGTGCCCGAGTGTGGATC-3'. The cDNAs  
427 were PCR amplified with the primers 26S rRNA-F: 5'-  
428 CAGATCACTCTGGTTCAATGTC-3' and 3' linker RT primers, gel purified and then  
429 deep sequenced using an Illumina platform, according to the manufacturer's  
430 instructions, by Novogene (Beijing, China). The number of reads with distinct 3' -end  
431 modifications were counted by custom Perl scripts.

432

#### 433 **RNAi inheritance assay**

434 Synchronized L1 animals of the indicated genotypes were exposed to bacteria  
435 expressing *gfp* dsRNA. F1 embryos were collected by hypochlorite/NaOH treatment  
436 and grown on HT115 control bacteria. The GFP expression levels in both the parental  
437 generation and the progeny were visualized and scored. Images were collected with a  
438 Leica DM4B microscope system.

439

#### 440 **Statistics**

441 Bar graphs with error bars represent the mean and SD. All of the experiments were  
442 conducted with independent *C. elegans* animals for the indicated N replicates.  
443 Statistical analysis was performed with two-tailed Student's t-tests or unpaired  
444 Wilcoxon tests. The threshold for Student's t-test *p* values was set to 0.05.

445

446



447 **Acknowledgments:**

448 We are grateful to Drs. Shanhui Liao and Shuai Wei, and the members of the Guang  
449 lab for their comments. We are grateful to the International *C. elegans* Gene Knockout  
450 Consortium and the National Bioresource Project for providing the strains. Some strains  
451 used in this study were provided by the CGC, which is funded by NIH Office of  
452 Research Infrastructure Programs (P40 OD010440). This work was supported by grants  
453 from the China Postdoctoral Science Foundation (2015M582006), the Natural Science  
454 Foundation of Anhui Province (1608085MC68), and the National Natural Science  
455 Foundation of China (Nos. 31671346, 91640110, 31870812 and 31871300). This study  
456 was supported, in part, by Hefei National Science Center Pilot Project Funds and CAS  
457 Interdisciplinary Innovation Team.

458

459 **Author Contributions**

460 Y.W., C.W., C. Z., and S.G. designed the experiments. Y.W., C.W., X.C., and X.H.  
461 performed experiments. Y.W. and C.W. analyzed the data. Y.W., C.W., and S.G. wrote  
462 the manuscript. All authors have discussed the manuscript.

463

464 **Declaration of Interests.** The authors declare no competing financial interests.

465

466

467

468 **References:**

469 Blahna MT, Jones MR, Quinton LJ, Matsuura KY, Mizgerd JP (2011) Terminal uridylyltransferase enzyme  
470 Zcchc11 promotes cell proliferation independent of its uridylyltransferase activity. *J Biol Chem* 286: 42381-  
471 9

472 Claycomb JM, Batista PJ, Pang KM, Gu W, Vasale JJ, van Wolfswinkel JC, Chaves DA, Shirayama M, Mitani  
473 S, Ketting RF, Conte D, Jr., Mello CC (2009) The Argonaute CSR-1 and its 22G-RNA cofactors are required  
474 for holocentric chromosome segregation. *Cell* 139: 123-34

475 De Almeida C, Scheer H, Zuber H, Gagliardi D (2018) RNA uridylation: a key posttranscriptional  
476 modification shaping the coding and noncoding transcriptome. *Wiley Interdisciplinary Reviews-Rna* 9

477 Faehnle CR, Walleshauser J, Joshua-Tor L (2014) Mechanism of Dis3l2 substrate recognition in the Lin28-  
478 let-7 pathway. *Nature* 514: 252-256

479 Feng GX, Zhu ZW, Li WJ, Lin QR, Chai YP, Dong MQ, Ou GS (2017) Hippo kinases maintain polarity during  
480 directional cell migration in *Caenorhabditis elegans*. *Embo Journal* 36: 334-345

481 Frokjaer-Jensen C, Davis MW, Sarov M, Taylor J, Flibotte S, LaBella M, Pozniakovskiy A, Moerman DG,  
482 Jorgensen EM (2014) Random and targeted transgene insertion in *Caenorhabditis elegans* using a  
483 modified Mos1 transposon. *Nat Methods* 11: 529-34

- 484 Guang S, Bochner AF, Pavelec DM, Burkhart KB, Harding S, Lachowiec J, Kennedy S (2008) An Argonaute  
485 transports siRNAs from the cytoplasm to the nucleus. *Science* 321: 537-41
- 486 Hagan JP, Piskounova E, Gregory RI (2009) Lin28 recruits the TUTase Zcchc11 to inhibit let-7 maturation  
487 in mouse embryonic stem cells. *Nat Struct Mol Biol* 16: 1021-5
- 488 Henras AK, Plisson-Chastang C, O'Donohue MF, Chakraborty A, Gleizes PE (2015) An overview of pre-  
489 ribosomal RNA processing in eukaryotes. *Wiley Interdiscip Rev RNA* 6: 225-42
- 490 Heo I, Ha M, Lim J, Yoon MJ, Park JE, Kwon SC, Chang H, Kim VN (2012) Mono-uridylation of pre-  
491 microRNA as a key step in the biogenesis of group II let-7 microRNAs. *Cell* 151: 521-32
- 492 Houseley J, LaCava J, Tollervey D (2006) RNA-quality control by the exosome. *Nature Reviews Molecular*  
493 *Cell Biology* 7: 529-539
- 494 Ibrahim F, Rymarquis LA, Kim EJ, Becker J, Balassa E, Green PJ, Cerutti H (2010) Uridylation of mature  
495 miRNAs and siRNAs by the MUT68 nucleotidyltransferase promotes their degradation in  
496 *Chlamydomonas*. *Proc Natl Acad Sci U S A* 107: 3906-11
- 497 Jones MR, Quinton LJ, Blahna MT, Neilson JR, Fu S, Ivanov AR, Wolf DA, Mizgerd JP (2009) Zcchc11-  
498 dependent uridylation of microRNA directs cytokine expression. *Nat Cell Biol* 11: 1157-63
- 499 Kamminga LM, Luteijn MJ, den Broeder MJ, Redl S, Kaaij LJ, Roovers EF, Ladurner P, Berezikov E, Ketting  
500 RF (2010) Hen1 is required for oocyte development and piRNA stability in zebrafish. *EMBO J* 29: 3688-  
501 700
- 502 Karbstein K (2013) Quality control mechanisms during ribosome maturation. *Trends Cell Biol* 23: 242-50
- 503 Kwak JE, Wickens M (2007) A family of poly(U) polymerases. *RNA* 13: 860-7
- 504 Lafontaine DL (2010) A 'garbage can' for ribosomes: how eukaryotes degrade their ribosomes. *Trends*  
505 *Biochem Sci* 35: 267-77
- 506 Lafontaine DLJ (2015) Noncoding RNAs in eukaryotic ribosome biogenesis and function. *Nature*  
507 *Structural & Molecular Biology* 22: 11-19
- 508 Le Pen J, Jiang H, Di Domenico T, Kneuss E, Kosalka J, Leung C, Morgan M, Much C, Rudolph KLM, Enright  
509 AJ, O'Carroll D, Wang D, Miska EA (2018) Terminal uridylyltransferases target RNA viruses as part of the  
510 innate immune system. *Nat Struct Mol Biol* 25: 778-786
- 511 Lee LW, Lee CC, Huang CR, Lo SJ (2012) The nucleolus of *Caenorhabditis elegans*. *J Biomed Biotechnol*  
512 2012: 601274
- 513 Lee M, Kim B, Kim VN (2014) Emerging roles of RNA modification: m(6)A and U-tail. *Cell* 158: 980-987
- 514 Lehrbach NJ, Armisen J, Lightfoot HL, Murfitt KJ, Bugaut A, Balasubramanian S, Miska EA (2009) LIN-28  
515 and the poly(U) polymerase PUP-2 regulate let-7 microRNA processing in *Caenorhabditis elegans*. *Nat*  
516 *Struct Mol Biol* 16: 1016-20
- 517 Li Y, Maine EM (2018) The balance of poly(U) polymerase activity ensures germline identity, survival and  
518 development in *Caenorhabditis elegans*. *Development* 145
- 519 Lubas M, Damgaard CK, Tomecki R, Cysewski D, Jensen TH, Dziembowski A (2013) Exonuclease hDIS3L2  
520 specifies an exosome-independent 3' '5' ' degradation pathway of human cytoplasmic mRNA. *Embo*  
521 *Journal* 32: 1855-1868
- 522 Menezes MR, Balzeau J, Hagan JP (2018) 3' ' RNA Uridylation in Epitranscriptomics, Gene Regulation,  
523 and Disease. *Frontiers in Molecular Biosciences* 5
- 524 Pena C, Hurt E, Panse VG (2017) Eukaryotic ribosome assembly, transport and quality control. *Nat Struct*  
525 *Mol Biol* 24: 689-699
- 526 Pirouz M, Du P, Munafo M, Gregory RI (2016) Dis3L2-Mediated Decay Is a Quality Control Pathway for  
527 Noncoding RNAs. *Cell Rep* 16: 1861-73

528 Pirouz M, Munafo M, Ebrahimi AG, Choe J, Gregory RI (2019) Exonuclease requirements for mammalian  
529 ribosomal RNA biogenesis and surveillance. *Nat Struct Mol Biol* 26: 490-500

530 Ren G, Xie M, Zhang S, Vinovskis C, Chen X, Yu B (2014) Methylation protects microRNAs from an AGO1-  
531 associated activity that uridylates 5' RNA fragments generated by AGO1 cleavage. *Proc Natl Acad Sci U*  
532 *S A* 111: 6365-70

533 Schmidt K, Butler JS (2013) Nuclear RNA surveillance: role of TRAMP in controlling exosome specificity.  
534 *Wiley Interdiscip Rev RNA* 4: 217-31

535 Spracklin G, Fields B, Wan G, Becker D, Wallig A, Shukla A, Kennedy S (2017) The RNAi Inheritance  
536 Machinery of *Caenorhabditis elegans*. *Genetics* 206: 1403-1416

537 Thoms M, Thomson E, Bassler J, Gnadig M, Griesel S, Hurt E (2015) The Exosome Is Recruited to RNA  
538 Substrates through Specific Adaptor Proteins. *Cell* 162: 1029-1038

539 Trippe R, Guschina E, Hossbach M, Urlaub H, Luhrmann R, Benecke BJ (2006) Identification, cloning, and  
540 functional analysis of the human U6 snRNA-specific terminal uridylyl transferase. *Rna-a Publication of*  
541 *the Rna Society* 12: 1494-1504

542 Ustianenko D, Pasulka J, Feketova Z, Bednarik L, Zigackova D, Fortova A, Zavolan M, Vanacova S (2016)  
543 TUT-DIS3L2 is a mammalian surveillance pathway for aberrant structured non-coding RNAs. *EMBO J* 35:  
544 2179-2191

545 van Wolfswinkel JC, Claycomb JM, Batista PJ, Mello CC, Berezikov E, Ketting RF (2009) CDE-1 affects  
546 chromosome segregation through uridylation of CSR-1-bound siRNAs. *Cell* 139: 135-48

547 Vanacova S, Stefl R (2007) The exosome and RNA quality control in the nucleus. *EMBO Rep* 8: 651-7

548 Warkocki Z, Krawczyk PS, Adamska D, Bijata K, Garcia-Perez JL, Dziembowski A (2018) Uridylation by  
549 TUT4/7 Restricts Retrotransposition of Human LINE-1s. *Cell* 174: 1537-+

550 Xu F, Feng XZ, Chen XY, Weng CC, Yan Q, Xu T, Hong MJ, Guang SH (2018) A Cytoplasmic Argonaute  
551 Protein Promotes the Inheritance of RNAi. *Cell Reports* 23: 2482-2494

552 Yan Q, Zhu C, Guang S, Feng X (2019) The Functions of Non-coding RNAs in rRNA Regulation. *Front Genet*  
553 10: 290

554 Yeo J, Kim VN (2018) U-tail as a guardian against invading RNAs. *Nature Structural & Molecular Biology*  
555 25: 903-905

556 Yi YH, Ma TH, Lee LW, Chiou PT, Chen PH, Lee CM, Chu YD, Yu H, Hsiung KC, Tsai YT, Lee CC, Chang YS,  
557 Chan SP, Tan BC, Lo SJ (2015) A Genetic Cascade of *let-7-ncl-1-fib-1* Modulates Nucleolar Size and rRNA  
558 Pool in *Caenorhabditis elegans*. *PLoS Genet* 11: e1005580

559 Zeng C, Weng C, Wang X, Yan YH, Li WJ, Xu D, Hong M, Liao S, Dong MQ, Feng X, Xu C, Guang S (2019)  
560 Functional Proteomics Identifies a PICS Complex Required for piRNA Maturation and Chromosome  
561 Segregation. *Cell Rep* 27: 3561-3572 e3

562 Zhou X, Chen X, Wang Y, Feng X, Guang S (2017a) A new layer of rRNA regulation by small interference  
563 RNAs and the nuclear RNAi pathway. *RNA Biol* 14: 1492-1498

564 Zhou XF, Feng XZ, Mao H, Li M, Xu F, Hu K, Guang SH (2017b) RdRP-synthesized antisense ribosomal  
565 siRNAs silence pre-rRNA via the nuclear RNAi pathway. *Nature Structural & Molecular Biology* 24: 258-  
566 +

567 Zhu C, Yan Q, Weng C, Hou X, Mao H, Liu D, Feng X, Guang S (2018) Erroneous ribosomal RNAs promote  
568 the generation of antisense ribosomal siRNA. *Proc Natl Acad Sci U S A* 115: 10082-10087

569

570

571 **Figure legends:**

572

573 **Figure 1. Antisense ribosomal siRNA (risiRNA) accumulated in *cde-1* mutants.**

574 (A) NRDE-3 localized to the nucleus in *eri-1(mg366);cde-1(tm936);GFP::NRDE-3*  
575 animals. Images show representative seam cells of *C. elegans*. The number of  
576 scored animals is indicated in the parentheses. White arrows, nucleus.

577 (B) The risiRNA sensor is silenced in the *cde-1* mutant. Indicates are imagers of late  
578 embryos. The levels of GFP expression were scored in the bottom panel.

579 (C) qRT-PCR analysis of risiRNA levels in indicated animals. Data are presented as the  
580 mean  $\pm$  s.d. n = 3.

581 (D-E) Deep sequencing of NRDE-3-associated siRNAs in indicated animals. The red  
582 dashed line indicates risiRNAs.

583 (F) The number of risiRNAs targeting the each region of pre-rRNA transcription unit  
584 were analyzed.

585

586 **Figure 2. CDE-1 uridylated risiRNA.**

587 (A) Deep sequencing of total small RNAs of indicated animals. The red dashed line  
588 indicates risiRNAs.

589 (B) Deep sequencing of Argonaute-associated siRNAs in indicated animals.

590 (C) Number of uridylated NRDE-3-associated risiRNAs in indicated animals.

591 (D) risiRNA elicited nucleolar accumulation of NRDE-3 in *cde-1* mutants. Indicated  
592 were images of late embryos of *eri-1(mg366);cde-1(tm936);GFP::NRDE-*  
593 *3;mCherry::FIB-1*. White arrows, nucleolus.

594

595 **Figure 3. CDE-1 interacted with SUSI-1(ceDIS3L2) in the germline.**

596 (A) CDE-1 largely colocalized with the P-granule marker PGL-1. Images show the  
597 germline cells of young adult animals.

598 (B) A summary of the top ten putative interacting proteins identified by CDE-1  
599 immunoprecipitation followed by mass spectrometry.

600 (C) The protein-protein interaction of CDE-1 and SUSI-1(ceDIS3L2) was assayed by  
601 coimmunoprecipitation followed by western blotting with the indicated antibodies.

602 (D) SUSI-1(ceDIS3L2) accumulated in the cytoplasm. Indicates were germline cells of  
603 young adult animals.

604

605 **Figure 4. CDE-1 was involved in the 3'-end uridylation of 26S rRNAs.**

606 (A) A schematic of the rRNA tail-seq method.

607 (B) Tail-seq data of 26S rRNAs from indicated animals at the embryo and L3 stages.  
608 The number of reads with untemplated oligouridylation at the 3'-ends is indicated.

609

610 **Figure 5. Both CDE-1 and SUSI-1(ceDIS3L2) were required for the inheritance of**  
611 **RNAi.**

612 (A) *mex-5p::GFP::H2B* transgenic animals were exposed to bacteria expressing *gfp*  
613 dsRNA. F1 embryos were isolated and grown on control bacteria in the absence  
614 of further *gfp* dsRNA treatment. GFP expression in the indicated animals was  
615 imaged in the germline and oocytes.

616 (B) The percentage of P0 and F1 animals expressing GFP was counted.

617

618 **Figure 6. A working model of risiRNA biogenesis in *C. elegans*.** The erroneous  
619 cellular rRNAs are scrutinized and suppressed through a number of mechanisms.  
620 Erroneous rRNAs are uridylylated by CDE-1 and degraded by exoribonucleases such as  
621 SUSI-1(ceDis3L2). The disruption of CDE-1 or SUSI-1(ceDis3L2) results in the  
622 accumulation of erroneous rRNAs that thereafter recruit RdRPs to synthesize risiRNA.  
623 A risiRNA-mediated feedback loop silences rRNA expression through RNAi  
624 machinery and compensates for the disruption of the degradation of erroneous rRNA  
625 transcripts.

626

627

628 **Figure S1. *rrf-1* and *rrf-2* were required for risiRNA production in the *cde-1***  
629 **mutant.**

630 (A) *CDE-1::mCherry* was able to redistribute NRDE-3 from the nucleus to the  
631 cytoplasm in *cde-1(tm936)* mutants. Indicates were the seam cells of indicated  
632 animals. White arrows, nucleus.

633 (B) The depletion of *pup-2* and *pup-3* together was not able to redistribute NRDE-3  
634 from the cytoplasm to the nucleus. Indicates were the seam cells of indicated  
635 animals. The numbers indicated the percentage of animals with nuclear enriched  
636 NRDE-3 in seam cells. The number of scored animals is indicated in the  
637 parentheses. White arrows, nucleus.

638 (C) *rrf-1* and *rrf-2* were required for risiRNA production. Images are of representative  
639 seam cells.

640 (D) The depletion of *rrf-1* and *rrf-2* partially restored the fecundity of *eri-*  
641 *1(mg366);cde-1(tm936)* animals. Data are presented as the mean  $\pm$  s.d. n = 3.

642

643

644 **Figure S2. Size distribution and 5' end nucleotide preference of siRNAs identified**  
645 **by deep sequencing.** (A) NRDE-3-, (B) HRDE-1-, and (C) WAGO-1-bound small  
646 RNAs in indicated animals were deep sequenced. Size distribution and 5' end  
647 nucleotide preference were analyzed.

648

649 **Figure S3. The expression pattern of CDE-1 at indicated developmental stages.**  
650 (A) CDE-1::GFP was visualized by fluorescent microscopy at indicated developmental  
651 stages.  
652 (B) Western blotting analysis of CDE-1::GFP was performed after GFP  
653 immunoprecipitation.

654

655 **Table S1: Strains used in this work.**

656

657 **Table S2: Primers used for quantitative real-time PCR analysis.**

658

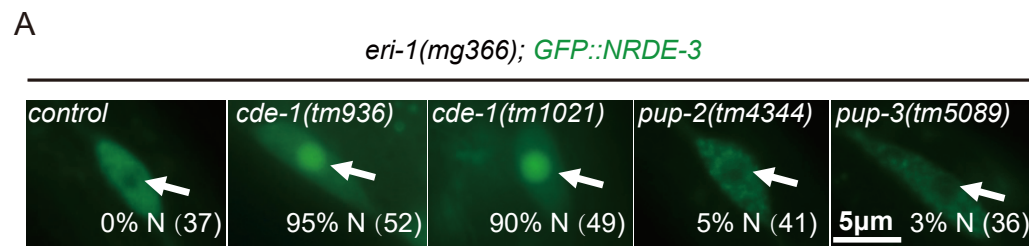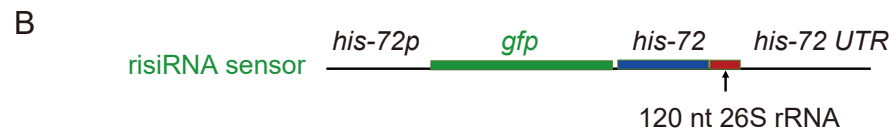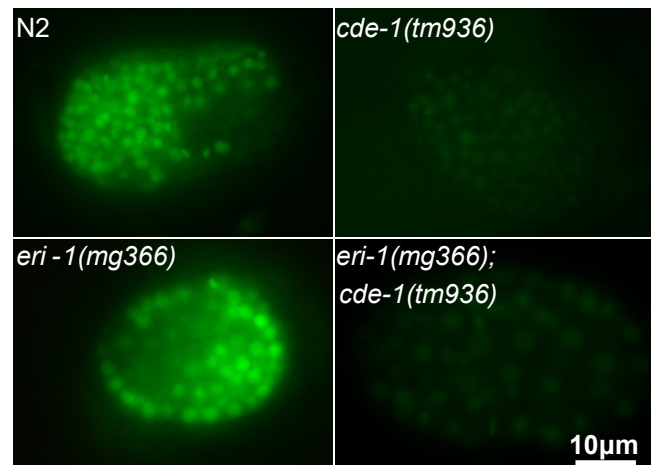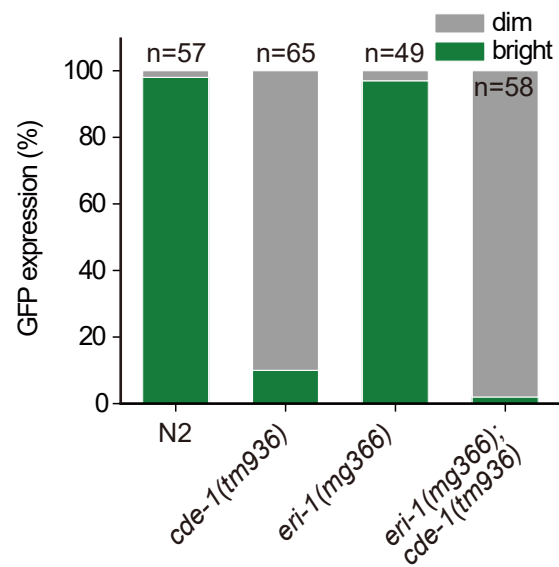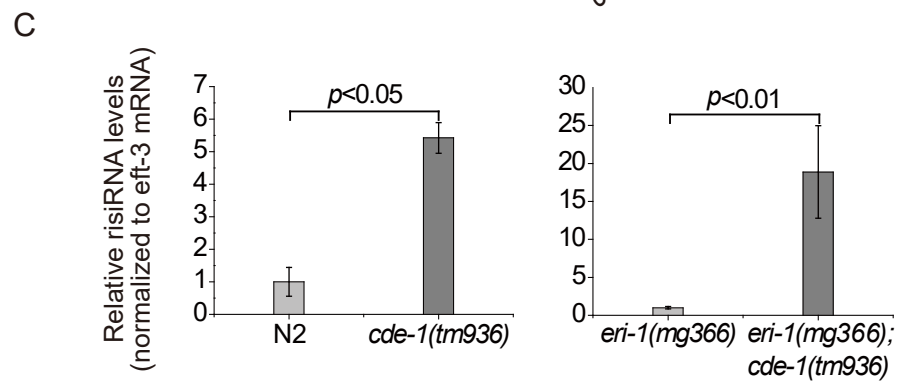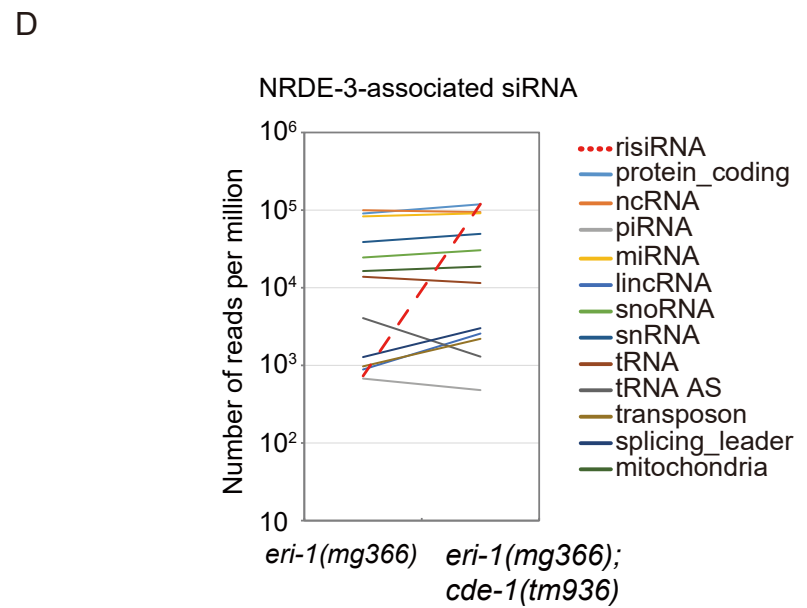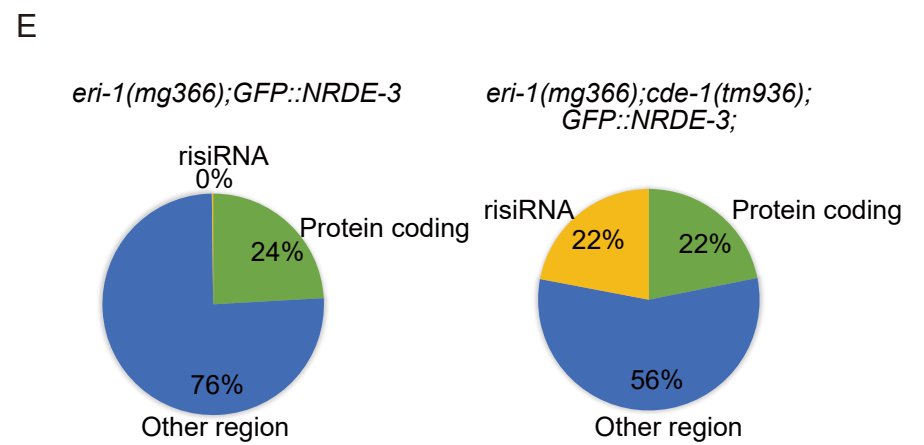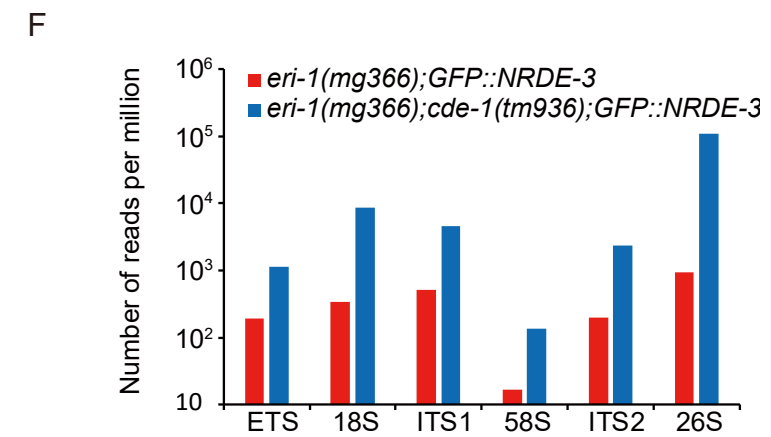

Figure1

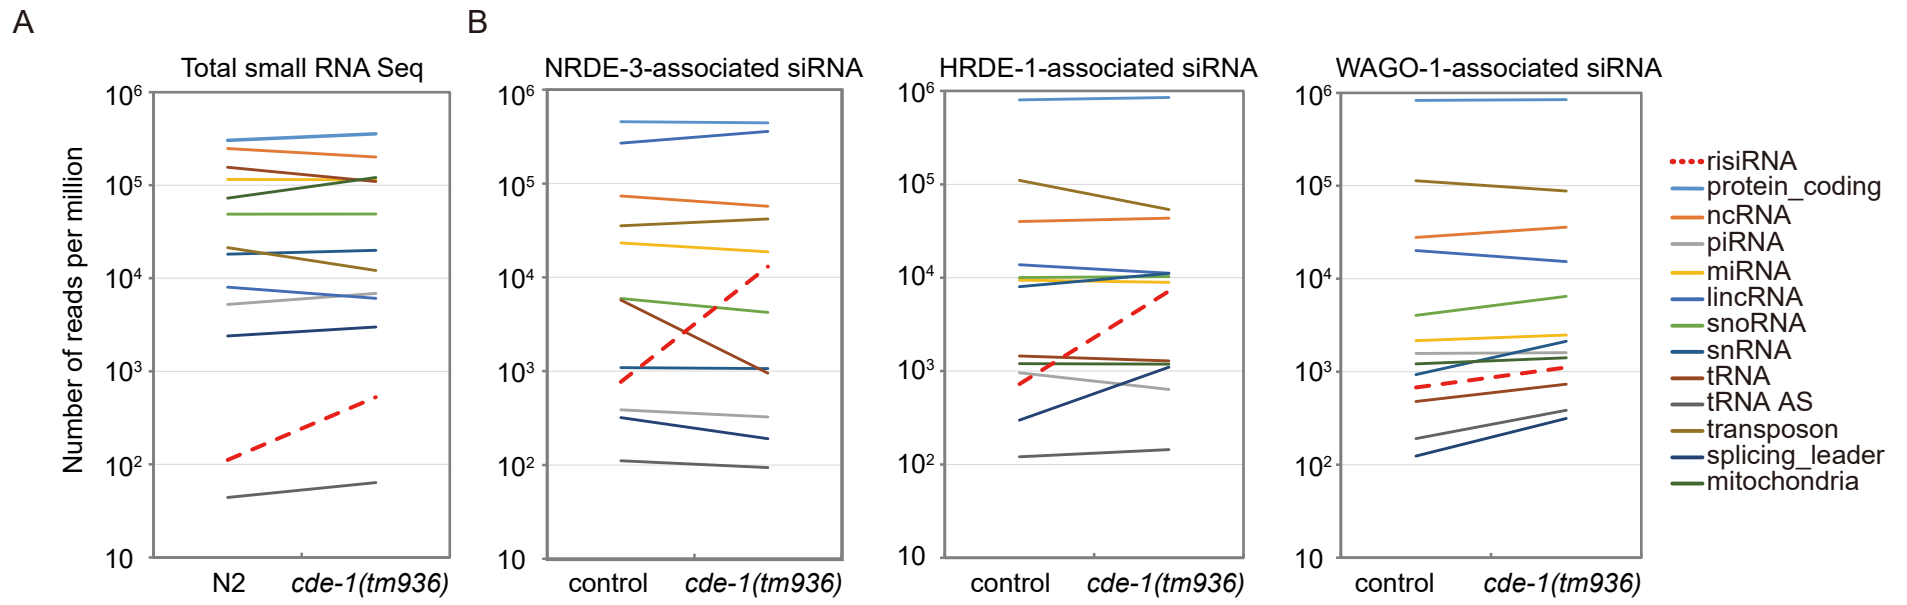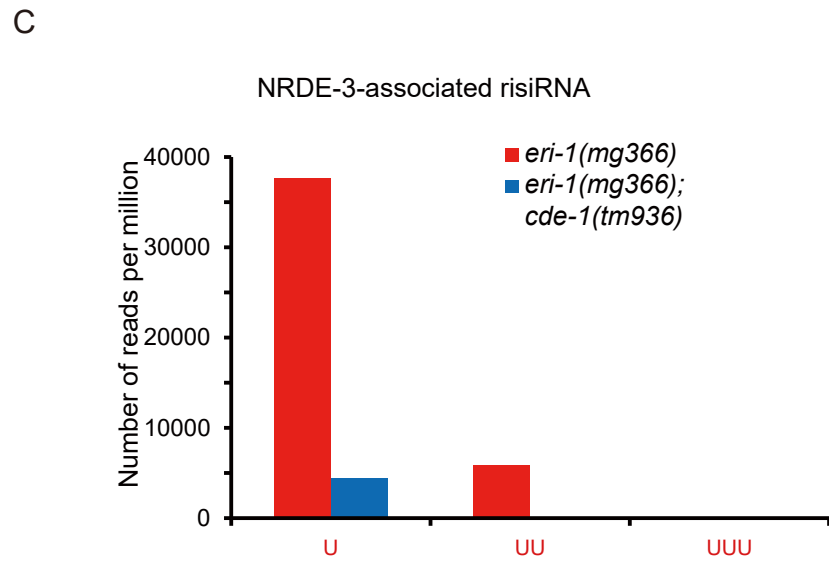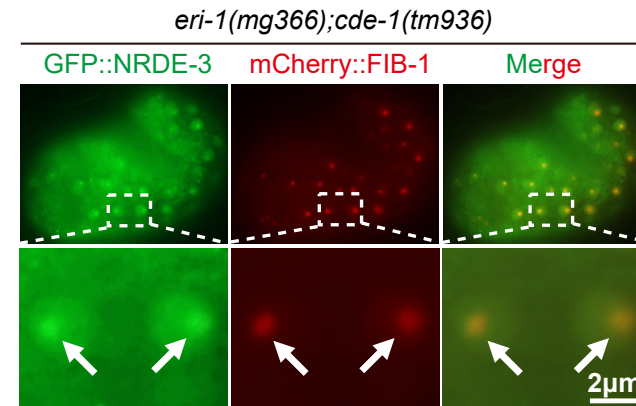

Figure 2



A

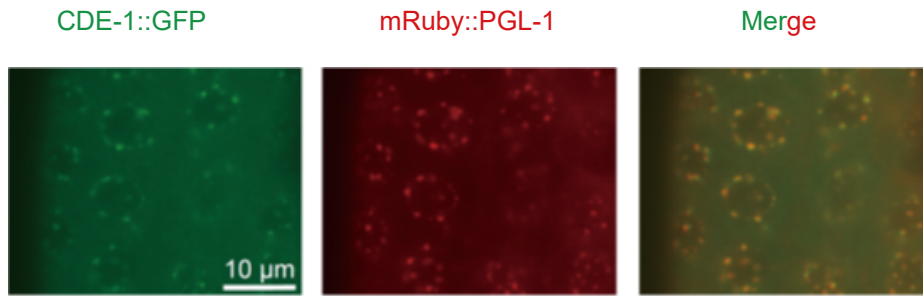

B

| CDE-1::GFP IP-MS |           |
|------------------|-----------|
| Gene Name        | WD score  |
| <i>cde-1</i>     | 4891.0159 |
| <i>F59A3.12</i>  | 2763.8325 |
| <i>T26A5.2</i>   | 1525.5073 |
| <i>susi-1</i>    | 820.5884  |
| <i>ife-1</i>     | 140.1329  |
| <i>his-58</i>    | 130.8378  |
| <i>T04A11.2</i>  | 118.9988  |
| <i>dao-5</i>     | 110.2445  |
| <i>mpk-1</i>     | 54.8059   |
| <i>C01B10.3</i>  | 47.5801   |
| <i>gst-36</i>    | 40.2765   |

C

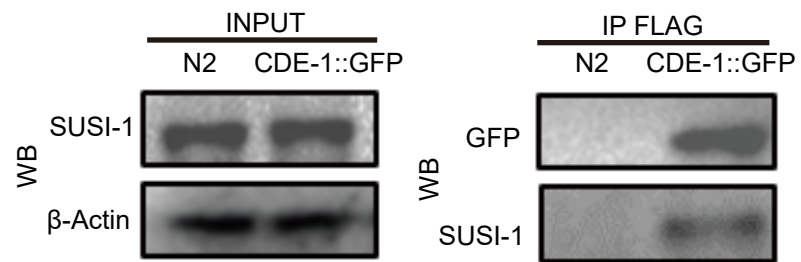

D

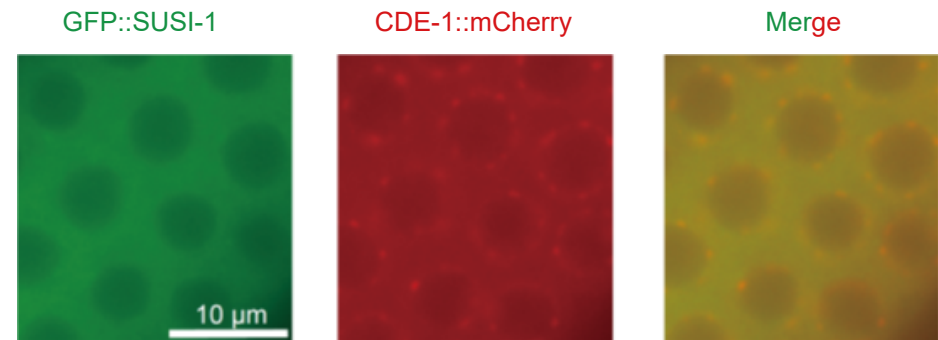

Figure 3

A

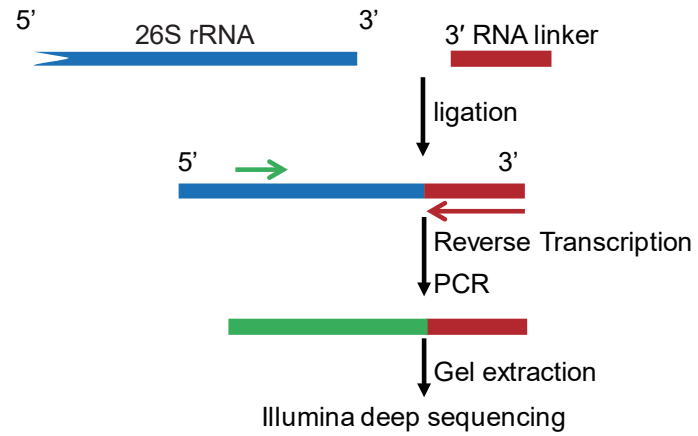

B

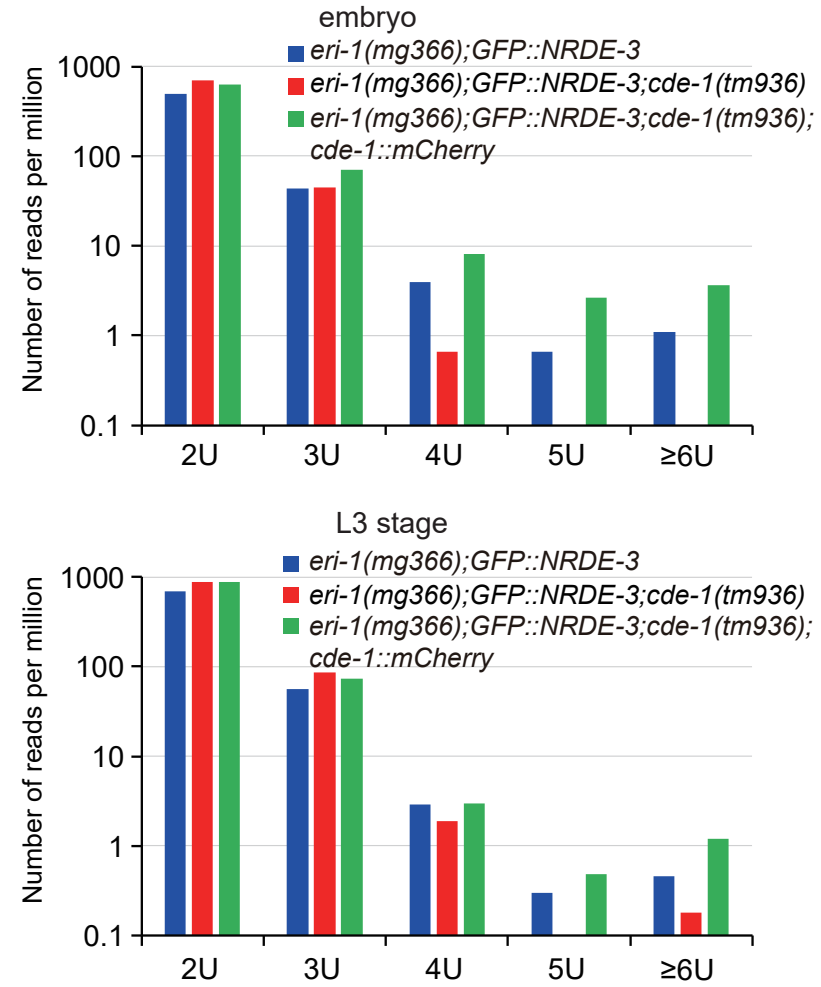

Figure 4

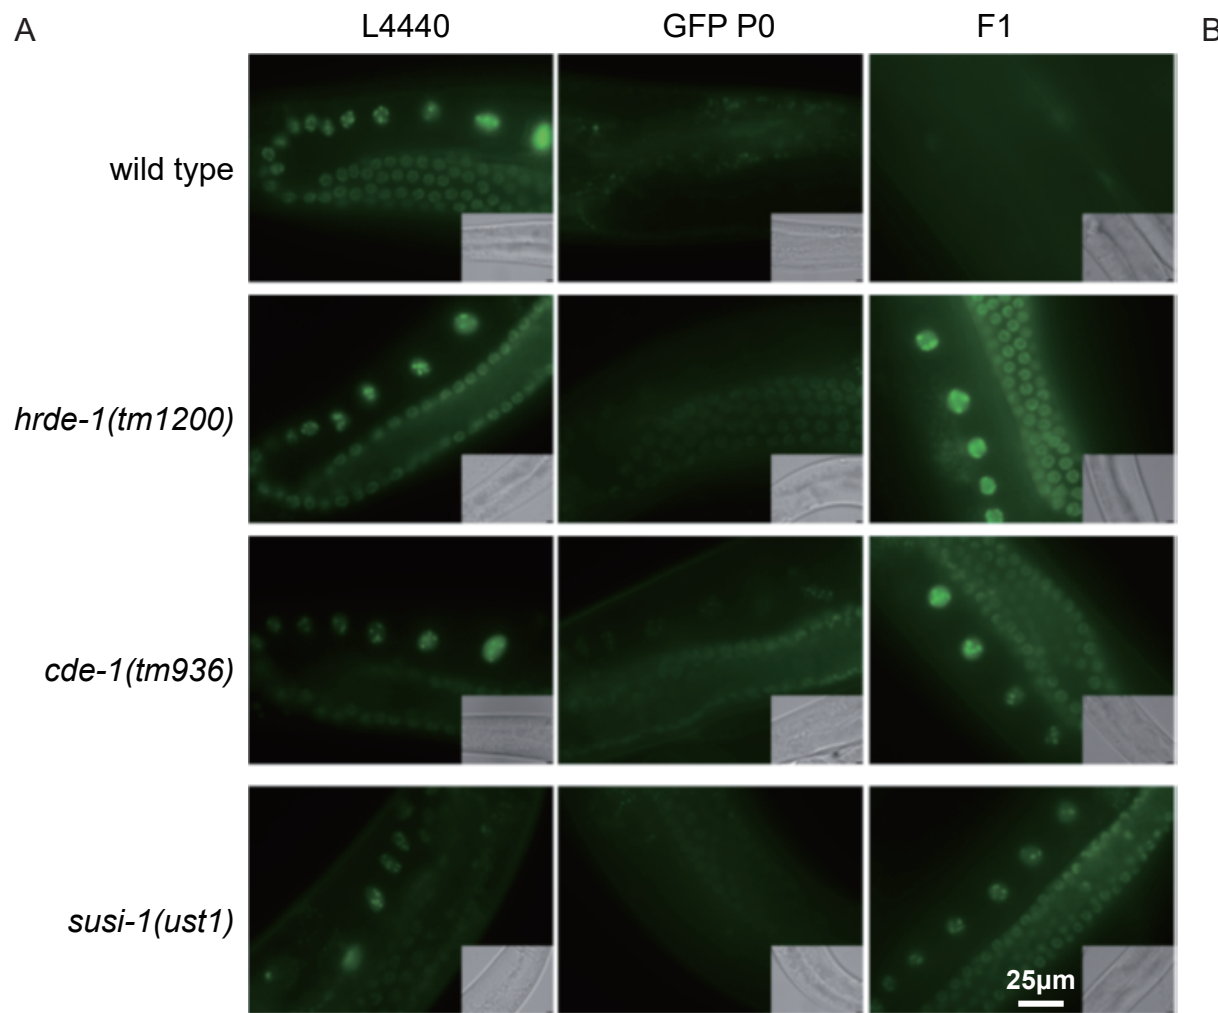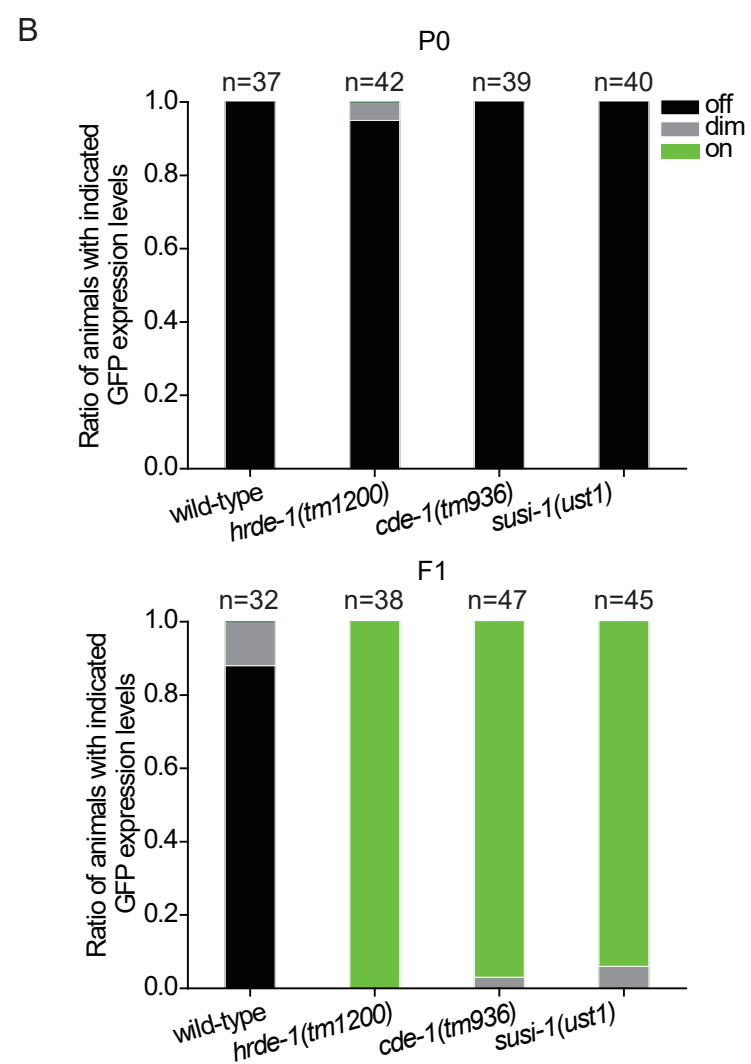

Figure 5

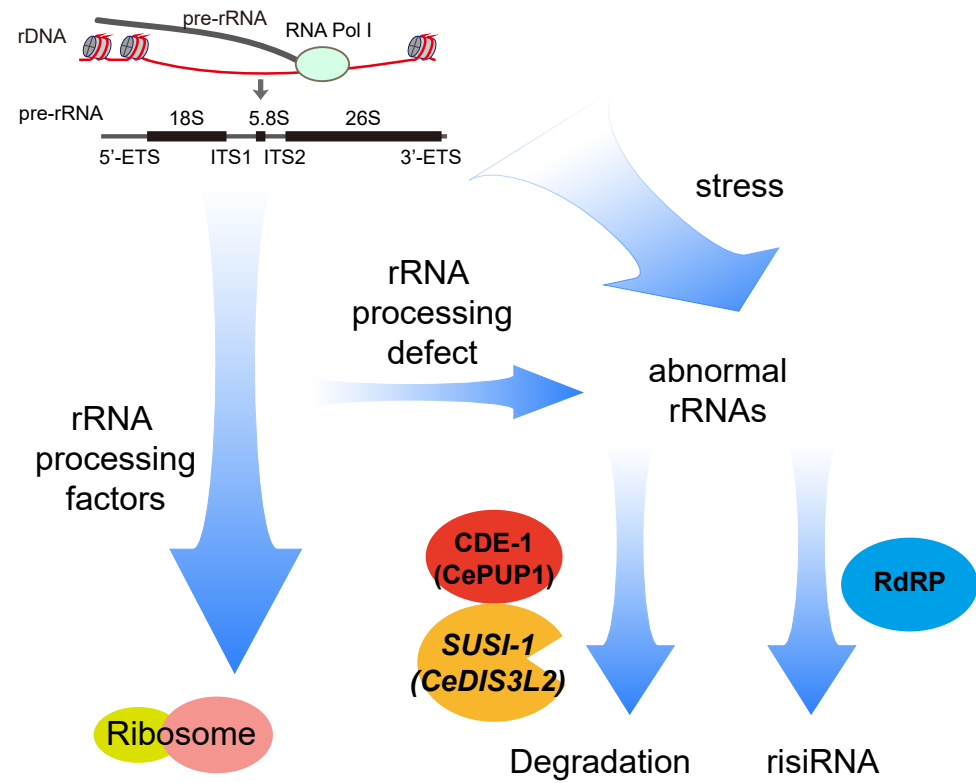

Figure 6

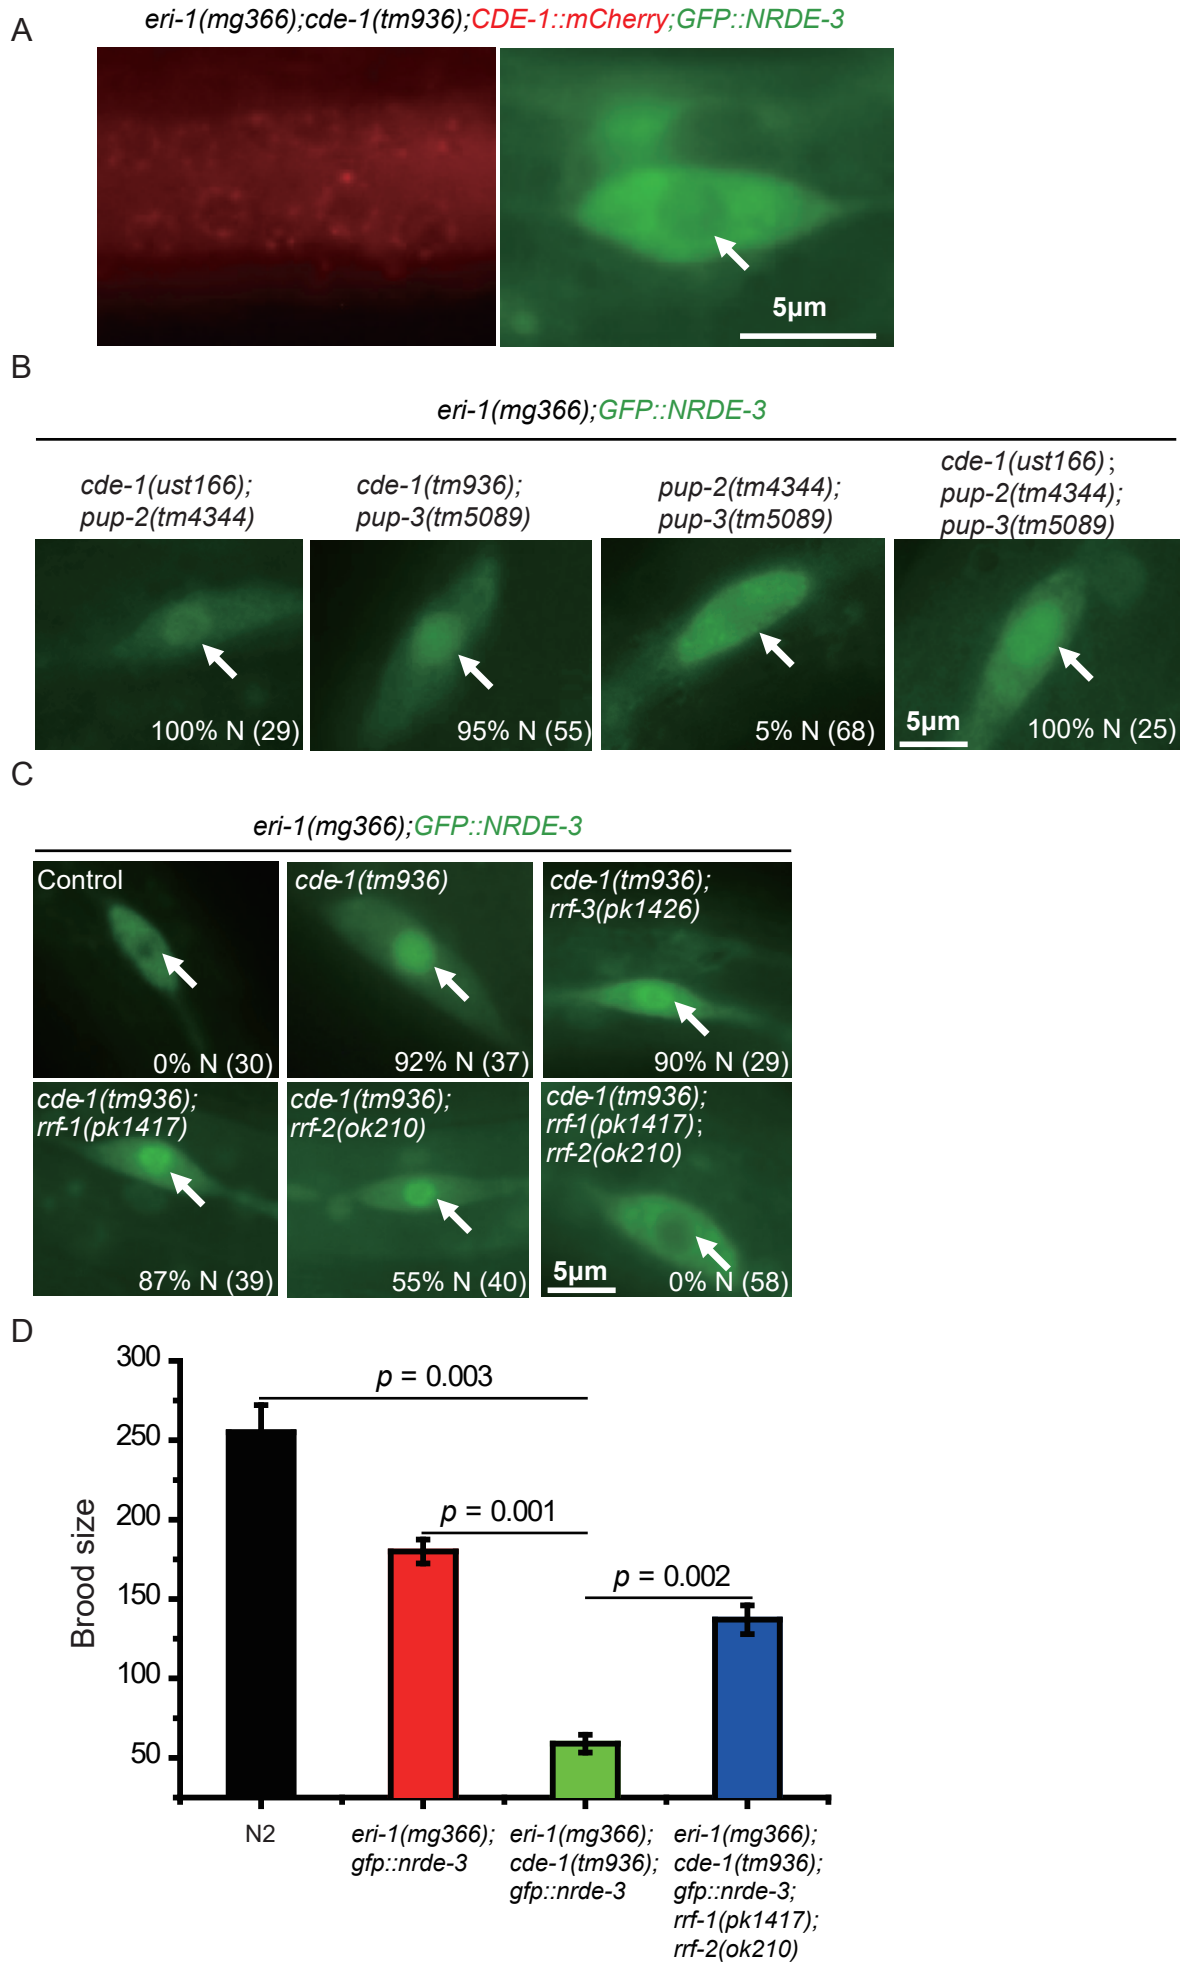

Figure S1

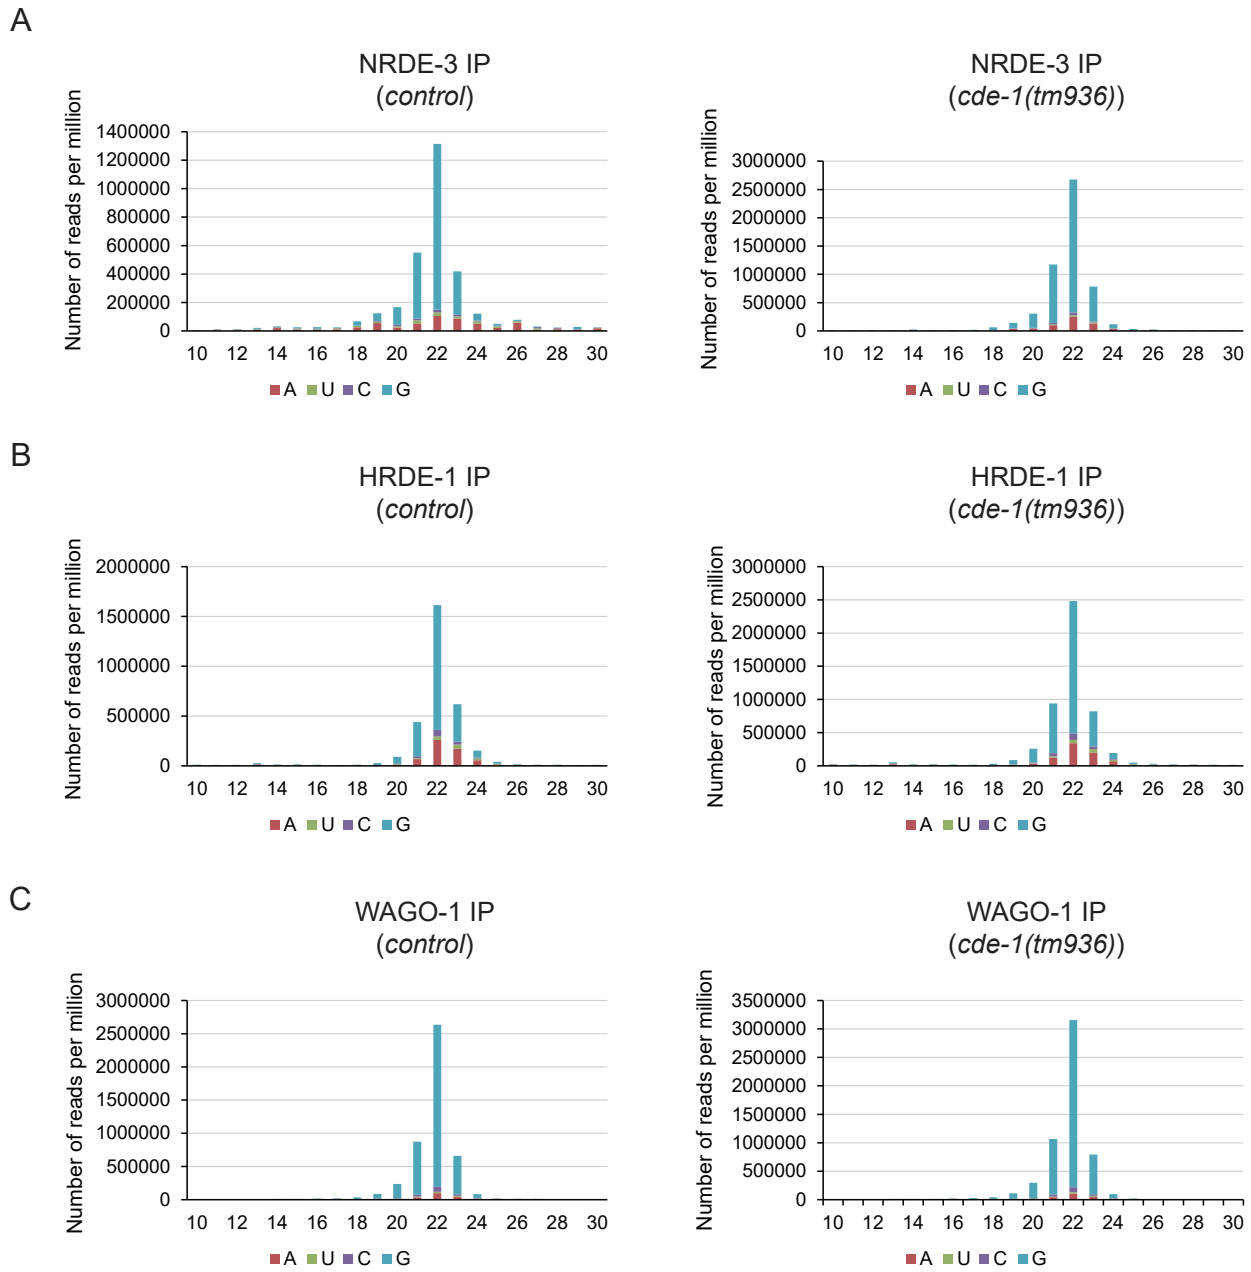

Figure S2

A

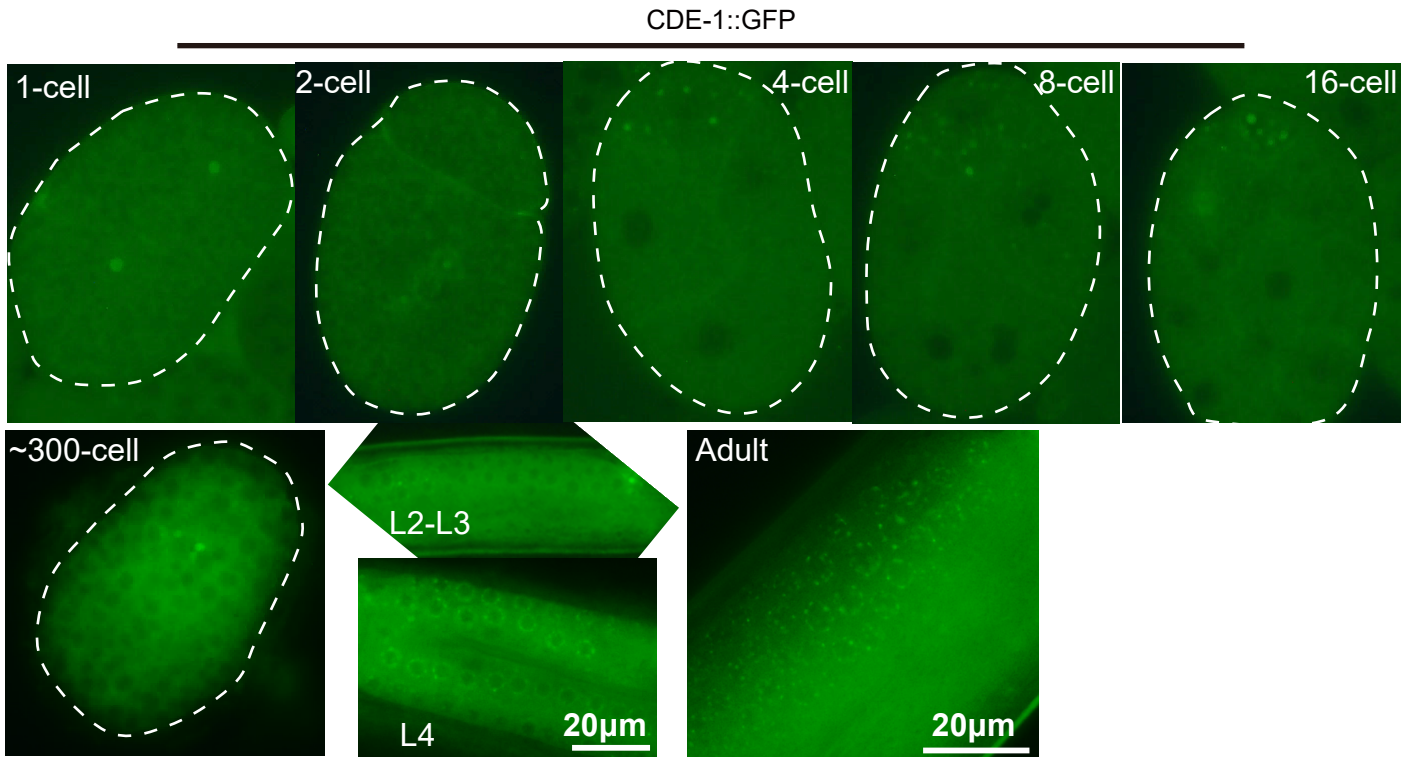

B

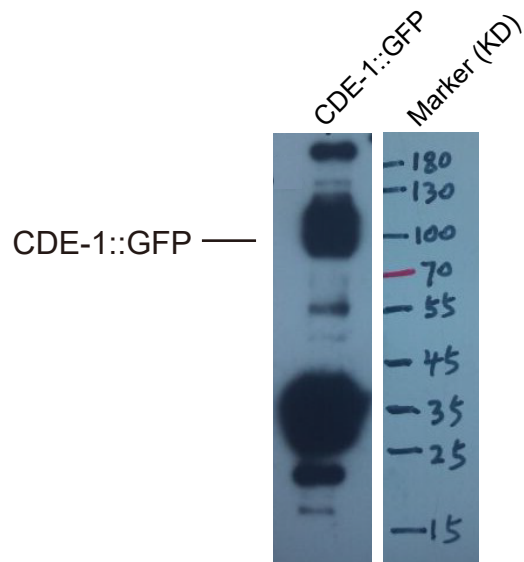

Figure S3

Table S1: Strains used in this work.

---

Genotype

---

N2

*eri-1(mg366)*

*eri-1(mg366);nrde-3p::GFP::NRDE-3(ggISI)*

*cde-1(tm936)*

*cde-1(tm1021)*

*eri-1(mg366);cde-1(tm936)*

*eri-1(mg366);cde-1(tm936); nrde-3p::GFP::NRDE-3(ggISI)*

*eri-1(mg366);cde-1(tm1021); nrde-3p::GFP::NRDE-3(ggISI)*

*cde-1p::CDE-1::mCherry(ustIS105)*

*eri-1(mg366);cde-1(tm936); nrde-3p::GFP::NRDE-3(ggISI); cde-1p::CDE-1::mCherry*

*pup-2(tm4344)*

*pup-3(tm5089)*

*eri-1(mg366);pup-2(tm4344); nrde-3p::GFP::NRDE-3(ggISI)*

*eri-1(mg366);pup-3(tm5089); nrde-3p::GFP::NRDE-3(ggISI)*

*eri-1(mg366);pup-2(tm4344);pup-3(tm5089); nrde-3p::GFP::NRDE-3(ggISI)*

*eri-1(mg366);cde-1(tm936);pup-3(tm5089); nrde-3p::GFP::NRDE-3(ggISI)*

*eri-1(mg366);cde-1(ust166); pup-2(tm4344); nrde-3p::GFP::NRDE-3(ggISI)*

*eri-1(mg366);cde-1(ust166); pup-2(tm4344); pup-3(tm5089); nrde-3p::GFP::NRDE-3(ggISI)*

*susi-1(ust1)*

*eri-1(mg366); susi-1(ust1); nrde-3p::GFP::NRDE-3(ggISI)*

*control\_sensor(ustIS38)*

*risiRNA\_sensor(ustIS37)*

*risiRNA\_sensor(ustIS37);eri-1(mg366)*

*risiRNA\_sensor(ustIS37);cde-1(tm936)*

*risiRNA\_sensor(ustIS37);eri-1(mg366);cde-1(tm936)*

*mCherry::FIB-1(ustIS36)*

*eri-1(mg366); nrde-3p::GFP::NRDE-3(ggISI);mCherry::FIB-1(ustIS36)*

*eri-1(mg366); nrde-3p::GFP::NRDE-3(ggISI);mCherry::FIB-1(ustIS36);cde-1(tm936)*

*eri-1(mg366);cde-1(tm936); nrde-3p::GFP::NRDE-3(ggISI);rrf-1(pk1417)*

*eri-1(mg366);cde-1(tm936); nrde-3p::GFP::NRDE-3(ggISI);rrf-2(ok210)*

*eri-1(mg366);cde-1(tm936); nrde-3p::GFP::NRDE-3(ggISI);rrf-3(pk1426)*

*eri-1(mg366);cde-1(tm936); nrde-3p::GFP::NRDE-3(ggISI);rrf-1(pk1417);rrf-2(ok210)*

*hrde-1p::GFP::HRDE-1(ustIS68)*

*cde-1(tm936); hrde-1p::GFP::HRDE-1(ustIS68)*

*wago-1p::GFP::WAGO-1(ustIS106)*

*cde-1(tm936); wago-1p::GFP::WAGO-1(ustIS106)*

*cde-1p::CDE-1::GFP(ustIS107)*

*dpy-30p::mRuby::PGL-1(hjSi396)*

*cde-1p::CDE-1::GFP(ustIS107); dpy-30p::mRuby::PGL-1(hjSi396)*

*susi-1p::GFP::SUSI-1(ustIS108)*

*cde-1p::CDE-1::mCherry(ustIS105); susi-1p::GFP::SUSI-1(ustIS108)*



*mex-5p::GFP::H2B(ustIS45)*

*hrde-1(tm1200); mex-5p::GFP::H2B(ustIS45)*

*cde-1(tm936); mex-5p::GFP::H2B(ustIS45)*

*susi-1(ust1); mex-5p::GFP::H2B(ustIS45)*

---

Table S2 Primers used for quantitative real-time PCR analysis

---

|                   |                                                        |
|-------------------|--------------------------------------------------------|
| <i>eft-3</i> RT F | ACTTGATCTACAAGTGCGGAGGA                                |
| <i>eft-3</i> RT R | AAAGATCCCTTACCCATCTCCTG                                |
| risiRNA RT        | GTCGTATCCAGTGCGTGTCGTGGAGTCGGCAATTGCACTGGATACGATGTCGGG |
| risiRNA qRT F     | GTGCGTGTCGTGGAGTCG                                     |
| risiRNA qRT R     | TGTCGGGAGGCATCTCTATCTC                                 |

---
